# Supplementary material for: Selective Impairments in Fine Neural Tuning for Print in Chinese Children with Developmental Dyslexia
Source: MDPI journal article supplement (doi:10.3390/brainsci13030379), 2023-02-22
Supplement: s1 [file s1]

# Supplementary Materials for

## Selective impairments in fine neural tuning for print in Chinese children with developmental dyslexia

### Results

#### P1 component

##### *P1 amplitude*

Neither main effect of the three-way ANOVA was significant, for Stimulus Type,  $F(3, 84) = 1.19, p = 0.32, \eta_p^2 = 0.04$ ; for Lateralization,  $F(1, 28) < 1$ ; for Reading Group,  $F(1, 28) = 1.22, p = 0.28, \eta_p^2 = 0.04$ . In addition, neither the interaction of the three-way ANOVA was significant, for Stimulus Category by Reading Group,  $F(3, 84) = 1.02, p = 0.38, \eta_p^2 = 0.04$ ; for the other interactions, all  $F$ -values  $< 1$ .

##### *P1 latency*

Results in the three-way ANOVA showed that the main effect of Stimulus Type showed a trend,  $F(3, 84) = 2.45, p = 0.09, \eta_p^2 = 0.08$ . The interaction of Lateralization by Reading Group was significant,  $F(1, 84) = 4.76, p = 0.04, \eta_p^2 = 0.15$ . However, the further analysis did not find significant difference across the four stimulus types (all  $p$ -values  $> 0.1$ ). In P7 electrode, TD children showed a trend in longer P1 latency than DD children ( $p = 0.07$ ). TD children showed a trend in shorter latency in P7 electrode relative to P8 electrode ( $p = 0.08$ ). Neither the main effect of Lateralization nor Reading Group was significant, all  $F$ -values  $< 1$ . The interaction of the three factors

was not significant, for Stimulus Category by Lateralization,  $F(3, 84) = 2.02, p = 0.13, \eta_p^2 = 0.07$ ; for the other interactions, all  $F$ -values  $< 1$ .

## N1 component

### *N1 latency*

Table S1 shows the N1 peak latency for four types of stimuli on the P7 and P8 channels in TD and DD groups.

Table S1 N1 peak latency (msec) in the TD and DD groups

| Group | P7 electrode |         |         |         | P8 electrode |         |         |         |
|-------|--------------|---------|---------|---------|--------------|---------|---------|---------|
|       | Real         | Pseudo  | False   | Stroke  | Real         | Pseudo  | False   | Stroke  |
| TD    | 220 (6)      | 215 (6) | 222 (5) | 219 (5) | 214 (5)      | 212 (5) | 213 (5) | 219 (5) |
| DD    | 211 (5)      | 213 (5) | 217 (5) | 219 (5) | 221 (4)      | 222 (4) | 219 (4) | 221 (4) |

Notes: In the parentheses are SEM.

Results in a similar three-way ANOVA revealed the main effects of Stimulus Type was significant,  $F(3, 84) = 3.00, p = 0.04, \eta^2 = 0.10$ . No other significant main effect was found, all  $F$ -values  $< 0.1$ . There was a trend in the Stimulus Type by Lateralization interaction,  $F(3, 84) = 2.29, p = 0.09, \eta^2 = 0.08$ . Neither Reading Group by Lateralization interaction,  $F(1, 28) = 2.49, p = 0.13, \eta^2 = 0.08$ , nor Reading Group by Stimulus Type interaction,  $F < 1$ , was significant. There was a trend in Stimulus Type by Lateralization by Reading group interaction,  $F(3, 84) = 2.43, p = 0.07, \eta^2 = 0.08$ . Further analysis showed that TD children showed a trend in shorter N1 latency for

pseudo characters than for stroke combination ( $p=0.05$ ) on P8 electrode, while DD children showed a similar effect on P7 electrode ( $p=0.09$ ).

Stimuli list

|                                                                                       |
|---------------------------------------------------------------------------------------|
| Real character                                                                        |
| <div>决钱袂次使线紂抉视</div> <div>记钊佯他衲初钹扞铄</div> <div>作很袜讷钎设祚即们</div> <div>快把钵钹传佻忖级体</div>   |
| Pseudo character                                                                      |
| <div>浪衲袂乍忖祢袂纆钹</div> <div>衲伙袂佻们讠捷佻袂</div> <div>忤悻伐祚钹钹林衲袂</div> <div>钵地衲仞佻伐袂毆纆</div>   |
| False character                                                                       |
| <div>刳忖木艮己尗尗门纆</div> <div>刳及欠尗乍木乍门忖</div> <div>𠂇巴尗尗尗千衲也尗内</div> <div>巴内尗见长衲羊尗不𠂇</div> |
| Stroke combination                                                                    |
| <div>𠂇尗尗𠂇𠂇尗尗尗</div> <div>𠂇𠂇𠂇𠂇𠂇𠂇𠂇𠂇</div> <div>𠂇𠂇𠂇𠂇𠂇𠂇𠂇𠂇</div> <div>𠂇𠂇𠂇𠂇𠂇𠂇𠂇𠂇</div>       |
